# Supplementary material
Source: Springer Nature journal article supplement (https://www.springermedizin.de/resource/supplementary/13058_2012_3195_MOESM7_ESM.pdf/9703468)

■ Wip1 WT

■ Wip1 KO

Virgin

3d Pregnant

7d Pregnant

14d Pregnant

A

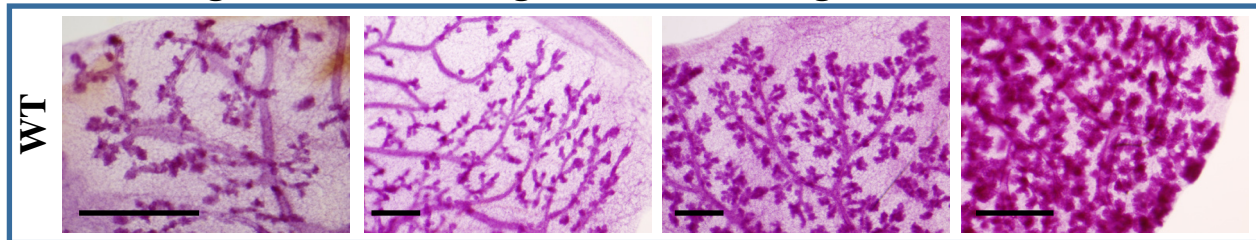

B

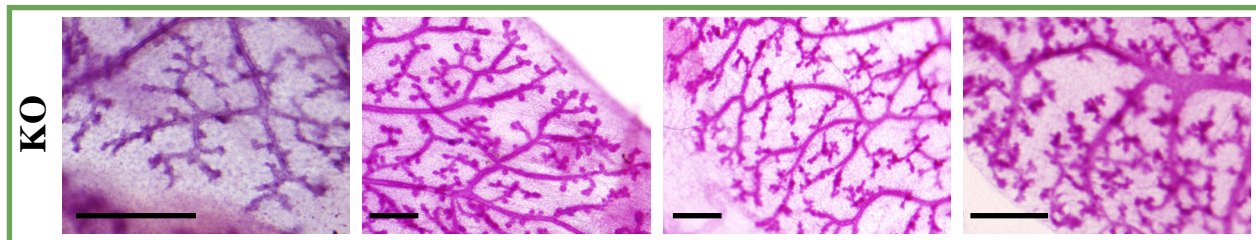

C

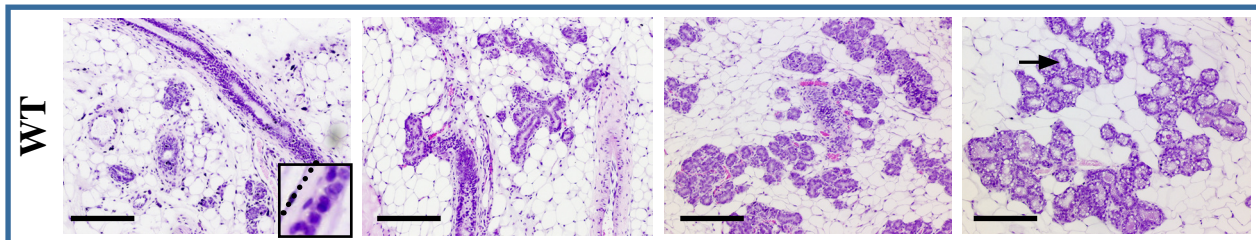

D

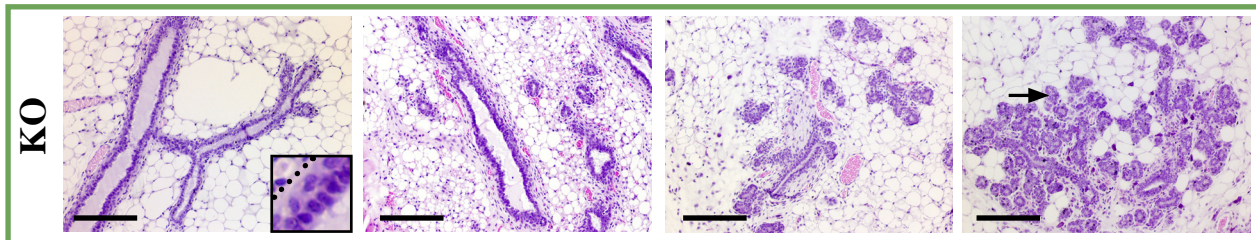

Supplement: MOESM7 [file 9703468]
